# Supplementary material
Source: PubMed Central journal article supplement (PMC10366945)
Supplement: jamapediatr-e232304-s002.pdf [file jamapediatr-e232304-s002.pdf]

## Data Sharing Statement

Antoon. Population-Based Incidence of Influenza-Associated Serious Neuropsychiatric Events in Children and Adolescents. *JAMA Pediatr*. Published July 24, 2023.

doi:10.1001/jamapediatrics.2023.2304

### Data

**Data available:** No

### Additional Information

**Explanation for why data not available:** Data use agreement with the TennCare program restricts sharing of individual patient level data. Access to the data can be requested through the TN Dept of Health and Division of TennCare.
